# Supplementary material for: Surface phase diagram and thermodynamic stability of functionalisation of nanodiamonds
Source: Royal Society of Chemistry journal article supplement (doi:10.1039/c2jm32640j), 2012-01-01
Supplement: c2jm32640j.pdf [file c2jm32640j.pdf]

# Surface Phase Diagram and Thermodynamic Stability of Functionalisation of Nanodiamonds<sup>†</sup>

Lin Lai,<sup>\*a</sup> Amanda S. Barnard<sup>a</sup>

## Supplementary Information

Figure 1 and Figure 2 present the formation energies of H- and O-passivation and OH-functionalisation, as a function of the partial pressure ( $\log(P/P_0)$ ) for the C<sub>705</sub> and C<sub>837</sub> nanodiamonds, respectively. The former is calculated at  $T = 1123.15$  K, and the latter at  $T = 298.15$  K.

Figure 3, Figure 4 and Figure 5 presents the temperature-dependent stability for H-passivated, O-passivated and OH-functionalised C<sub>705</sub> and C<sub>837</sub> nanodiamonds, respectively (at atmospheric pressure). The details of these results can be found in reference 1.

## References

- 1 L. Lai and A. S. Barnard, *Nanoscale*, 2011, **3**, 2566–2575.

---

<sup>a</sup> CSIRO Materials Science and Engineering, Parkville, VIC, 3052, Australia. Fax: +61-3-9662-7145; Tel: +61-3-9662-7356; E-mail: amanda.barnard@csiro.au

---

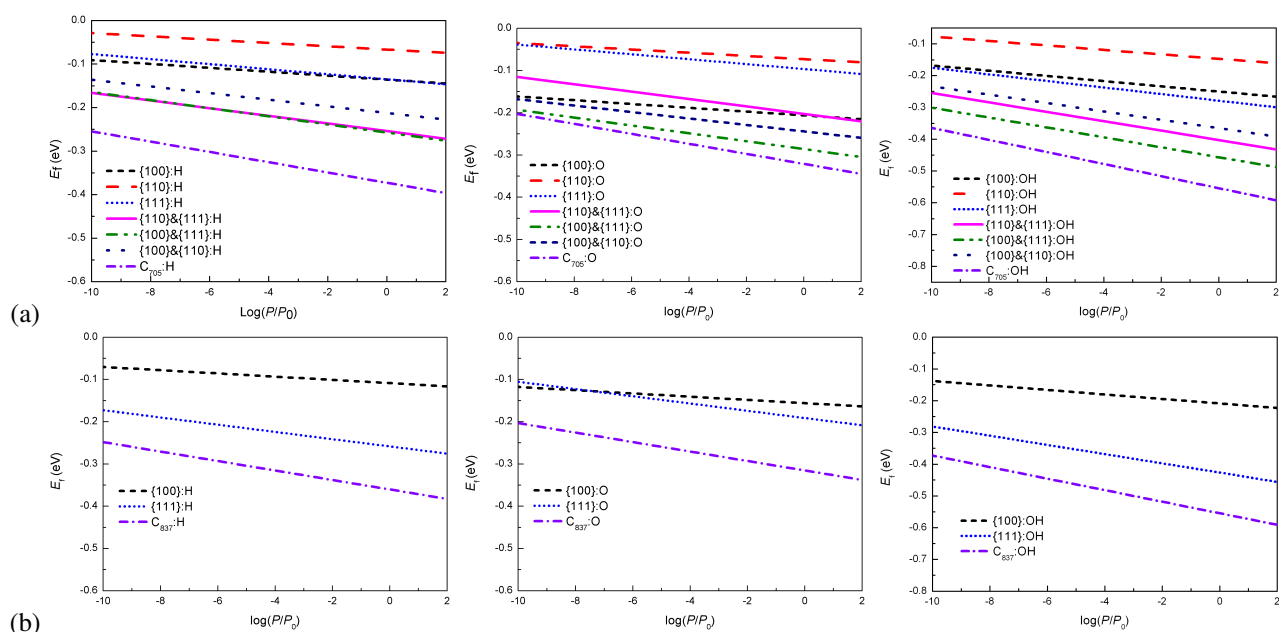

**Fig. 1** Formation energy versus partial pressure ( $\log(P/P_0)$ ) for  $C_{705}$  (upper) and  $C_{837}$  (lower) nanodiamonds at  $T=1123.15$  K.

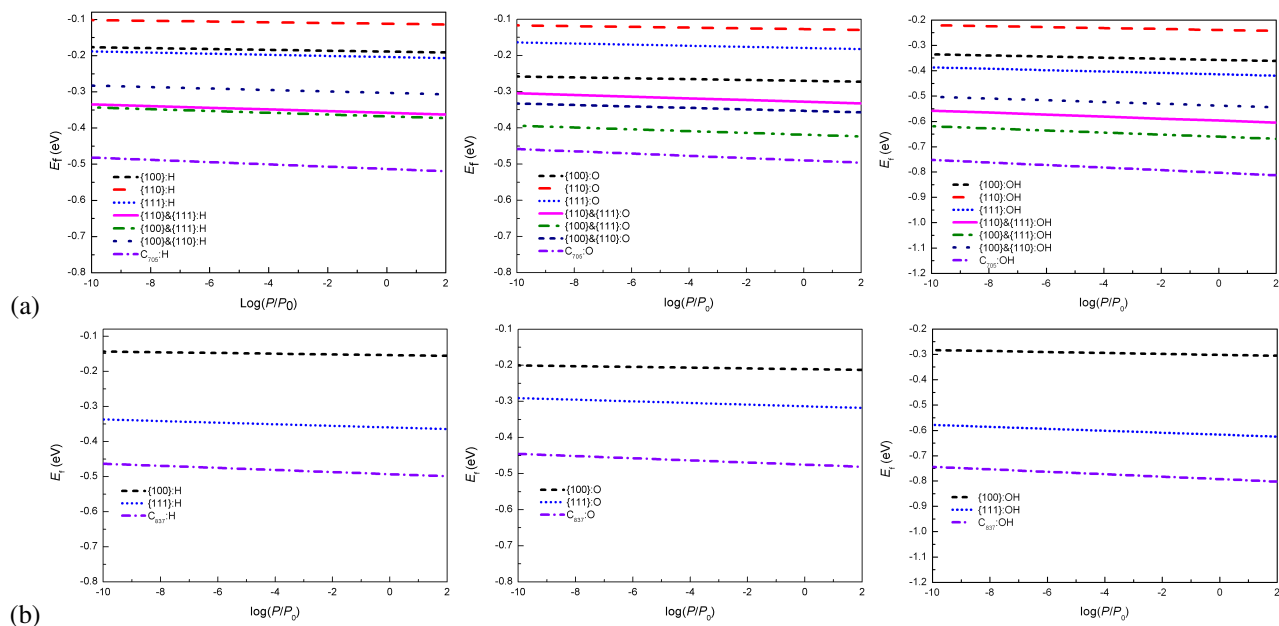

**Fig. 2** Formation energy versus partial pressure ( $\log(P/P_0)$ ) for  $C_{705}$  (upper) and  $C_{837}$  (lower) nanodiamonds at  $T=298.15$  K.

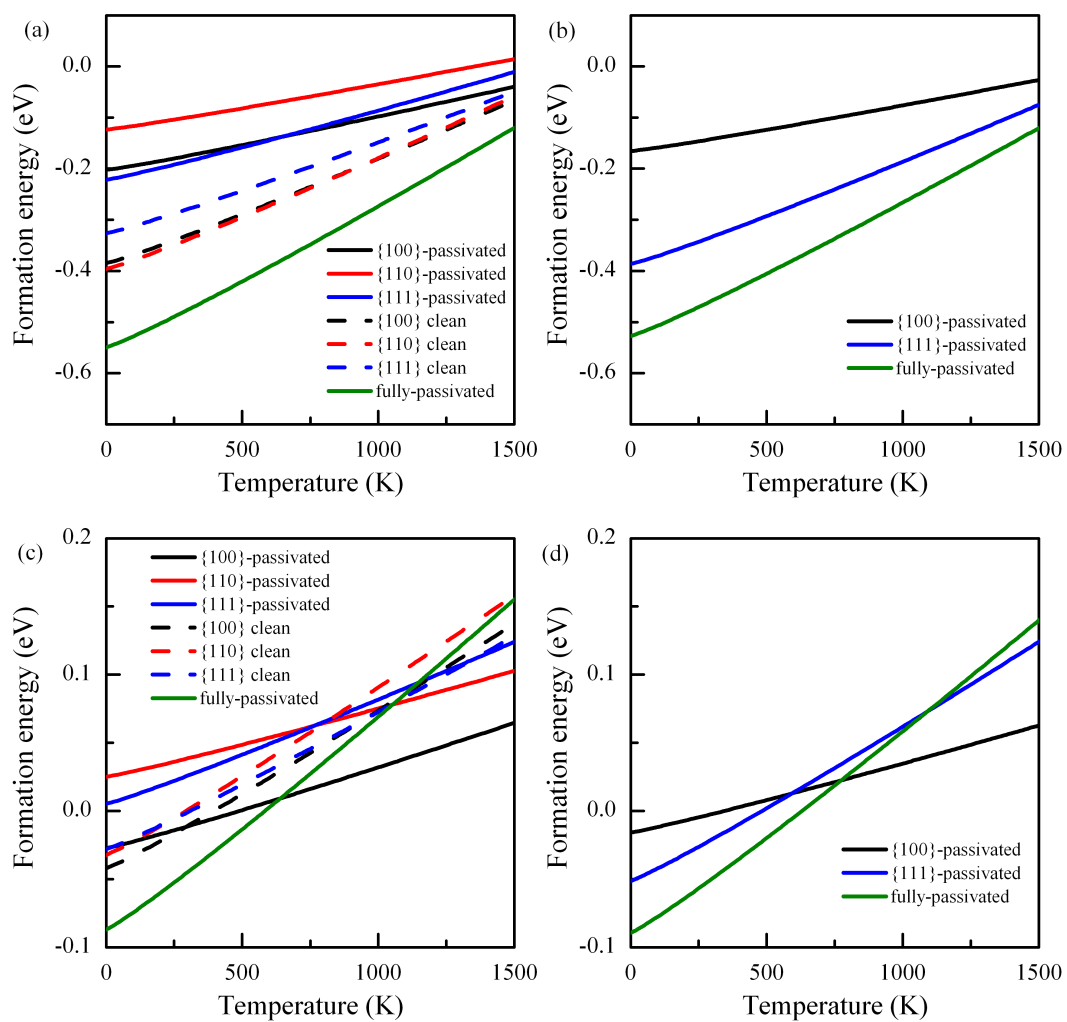

**Fig. 3** Formation energy versus temperatures for H-passivated  $C_{705}$  (left) and  $C_{837}$  (right) nanodiamonds at a pressure of 1 atm.

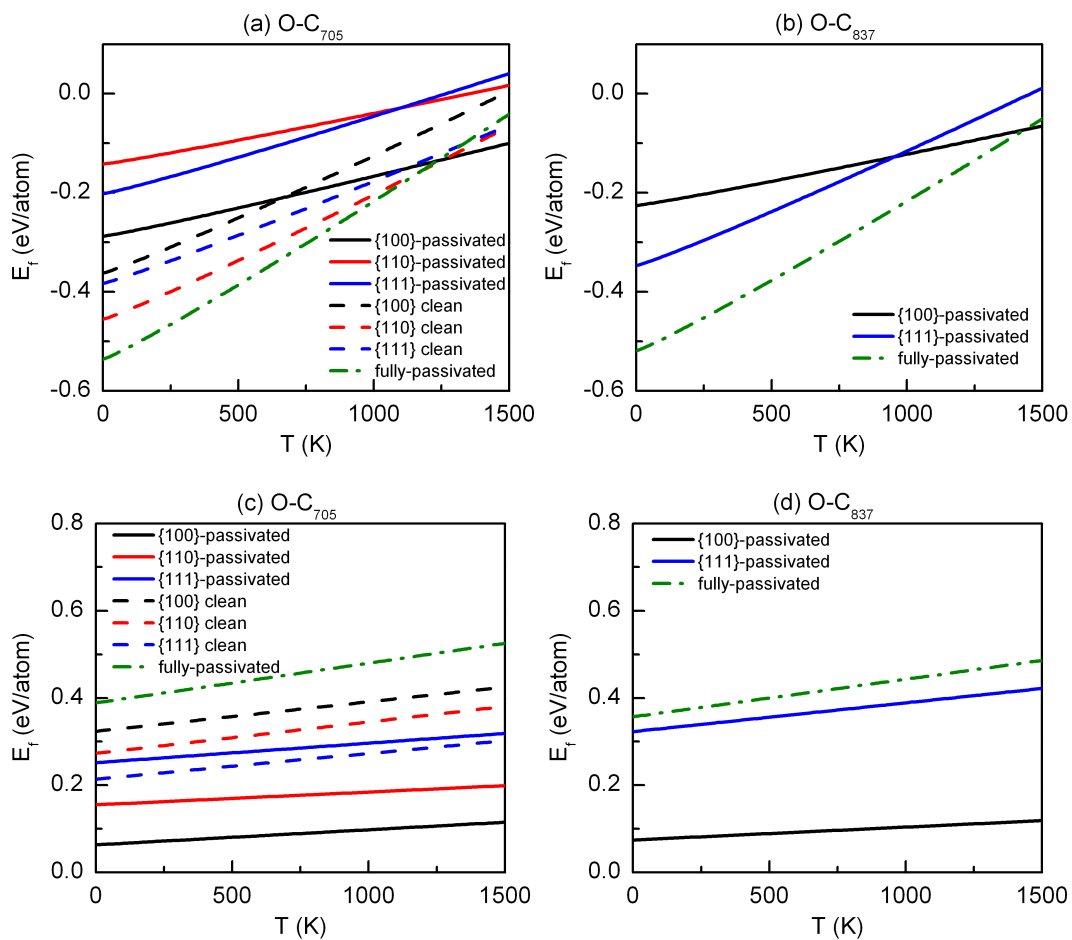

**Fig. 4** Formation energy versus temperatures for O-passivated C<sub>705</sub> (left) and C<sub>837</sub> (right) nanodiamonds at a pressure of 1 atm.

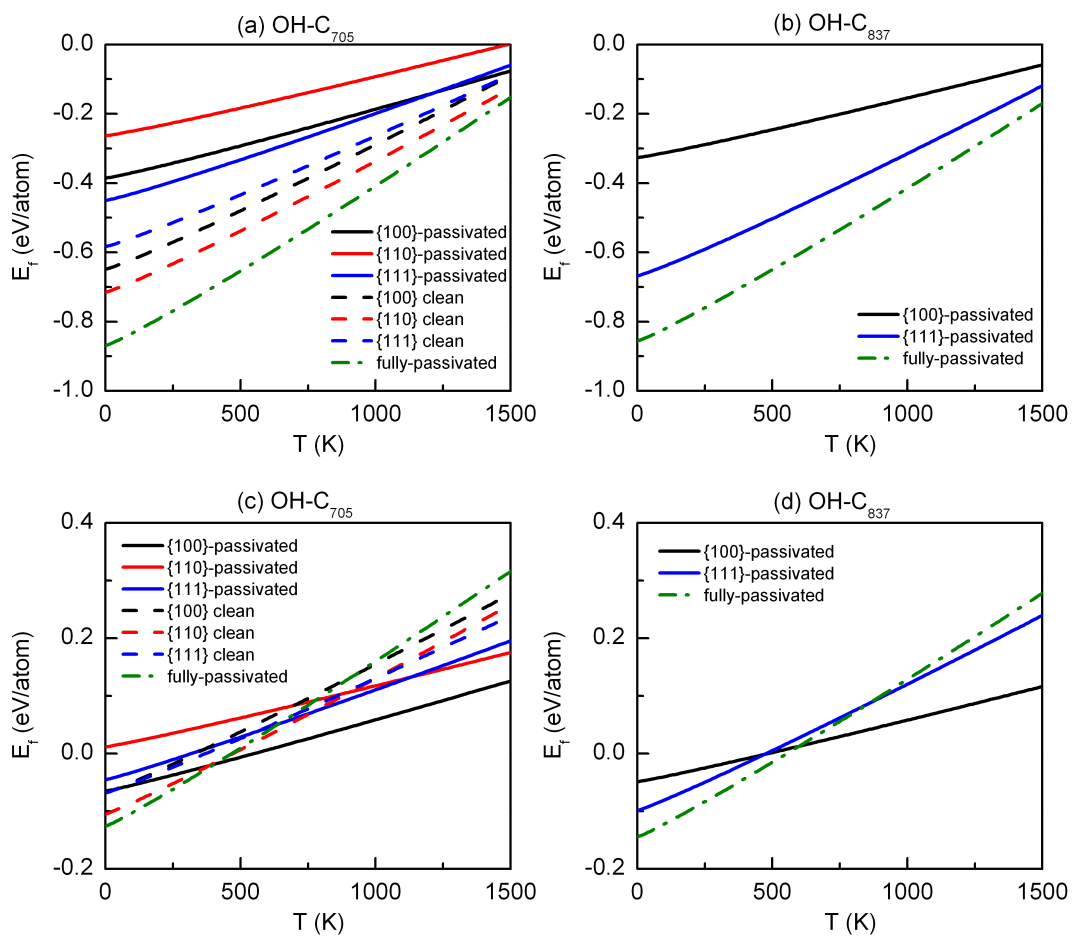

**Fig. 5** Formation energy versus temperatures for OH-functionalised C<sub>705</sub> (left) and C<sub>837</sub> (right) nanodiamonds at a pressure of 1 atm.
